# Supplementary material
Source: PubMed Central journal article supplement (PMC5023457)
Supplement: NIHMS756739-supplement-1.pdf [file NIHMS756739-supplement-1.pdf]

**Supplementary Table 1.** Differentially expressed (DE) genes from four group comparisons shown in Fig 6B

\*Positive and negative values represent genes upregulated and downregulated, respectively, in MKP-T compared to MKP-Lung cells

#Positive and negative values represent genes upregulated and downregulated, respectively, in MKP-Lung line compared to MKP-Liver cells

^Positive and negative values represent genes upregulated and downregulated, respectively, in MKP-Liver compared to MKP-T cells

&Positive and negative values represent genes upregulated and downregulated, respectively, in MKPOSE-AdCre compared to MKPOSE-EV cells

| <b>Lung vs T</b> | log2_fold_change<br>(Lung/T) * | <b>Lung vs Liver</b> | log2_fold_change<br>(Lung/Liver) # | <b>Liver vs T</b> | log2_fold_change<br>(Liver/T) ^ | <b>AdCre vs EV</b> | log2_fold_change<br>(AdCre/EV) & |
|------------------|--------------------------------|----------------------|------------------------------------|-------------------|---------------------------------|--------------------|----------------------------------|
| Adap1            | 3.48                           | 0610011F06Rik        | -2.62                              | 1700026D08Rik     | 4.18                            | 1700003F12Rik      | 3.39                             |
| Akap12           | -3.55                          | 2600006K01Rik        | -2.29                              | 2010204K13Rik     | -3.71                           | 1700026D08Rik      | -2.28                            |
| Arap3            | -6.97                          | 2900026A02Rik        | 2.56                               | 2310075K07Rik     | 1.89                            | 2900026A02Rik      | -3.78                            |
| Areg             | -5.34                          | 4930502E18Rik        | -5.72                              | 2700060E02Rik     | 2.98                            | 3110007F17Rik      | 2.46                             |
| Atp1b1           | 3.71                           | 4930506M07Rik        | -4.27                              | 2810417H13Rik     | -2.15                           | A230050P20Rik      | 3.85                             |
| B3galnt1         | 5.07                           | 6430548M08Rik        | -4.24                              | 4930486L24Rik     | -2.22                           | A730049H05Rik      | -2.10                            |
| BC028528         | 4.67                           | 6720475J19Rik        | -6.41                              | 4930502E18Rik     | 7.28                            | Abca3              | -3.10                            |
| Bmp4             | 5.07                           | 9330182L06Rik        | -3.32                              | 4930506M07Rik     | 3.75                            | Acot11             | -3.91                            |
| Cadm1            | -6.19                          | 9930014A18Rik        | -3.09                              | 6030419C18Rik     | 2.36                            | Acss2              | 2.19                             |
| Capn6            | 4.17                           | A730049H05Rik        | -3.67                              | 6430548M08Rik     | 2.47                            | Actg2              | 2.57                             |
| Ccdc80           | 4.70                           | Abat                 | -7.20                              | 6720475J19Rik     | 5.94                            | Adamts12           | 2.56                             |
| Cd93             | -4.79                          | Abca3                | -2.84                              | 9930014A18Rik     | 3.49                            | Adamts2            | 4.97                             |
| Cdkn2b           | -6.99                          | Abca9                | -2.83                              | 9930111J21Rik2    | -2.14                           | Adap1              | 4.11                             |
| Clec4d           | -3.89                          | Acaa2                | -2.81                              | A330021E22Rik     | 2.85                            | Adh7               | 4.98                             |
| Col15a1          | 6.31                           | Acot11               | -3.06                              | A730049H05Rik     | 3.38                            | Adm                | 3.79                             |
| Col4a1           | -4.16                          | Acsf2                | -2.53                              | AA467197          | -5.17                           | Al118078           | -2.44                            |
| Cotl1            | -5.13                          | Actn3                | -4.25                              | Abat              | 7.66                            | Akap12             | -2.93                            |
| Cpne8            | -5.09                          | Adam12               | 2.66                               | Abca9             | 3.88                            | Aldh1a1            | -5.55                            |
| Crct1            | -6.02                          | Adamts12             | -4.12                              | Abcc3             | 3.21                            | Aldh1l2            | 5.76                             |
| Ctsk             | 6.71                           | Adamts7              | -2.99                              | Abcc4             | -3.46                           | Aldh3b1            | -2.37                            |
| Cxcl14           | 6.08                           | Adap1                | 3.82                               | Abcc5             | 1.90                            | Ampd3              | 2.83                             |
| Cyba             | 3.88                           | Adh7                 | 7.04                               | Acaa2             | 3.46                            | Ang4               | -4.87                            |
| Ddit4l           | 4.11                           | Agpat4               | 4.94                               | Acot11            | 2.28                            | Angptl6            | 2.89                             |
| Def6             | 3.78                           | Ahnak                | 2.21                               | Acsbg1            | -1.80                           | Ank                | 5.95                             |
| Emb              | 3.57                           | Ahsp                 | -6.67                              | Acsf2             | 3.66                            | Ank3               | 4.40                             |
| Eng              | -4.70                          | Aig1                 | 3.02                               | Acsl6             | -1.85                           | Ankrd1             | 6.16                             |
| Enox1            | 5.16                           | Akap12               | -4.91                              | Actn3             | 4.48                            | Anxa11             | -2.56                            |
| Enpp1            | 4.70                           | Akr1c12              | -2.64                              | Adam33            | 3.78                            | Apobec1            | 2.68                             |
| Epb4.1l3         | -5.81                          | Akt3                 | 3.86                               | Adamts1           | -2.28                           | Apobr              | 4.34                             |
| Epha3            | 5.65                           | Aldh1a1              | -9.14                              | Adamts12          | 4.11                            | Aqp1               | 3.38                             |
| Eps8l2           | 4.83                           | Aldh1a7              | -5.19                              | Adh7              | -5.60                           | Arg1               | -2.92                            |
| Esm1             | -7.19                          | Aldh1l2              | 6.50                               | Adrb2             | -2.45                           | Arhgdib            | -4.33                            |
| Fam132b          | 4.84                           | Aldh6a1              | -3.04                              | Adss              | -1.85                           | Arhgdig            | -3.81                            |
| Fbln1            | -3.07                          | Aldoc                | -7.85                              | Agpat2            | -1.93                           | Arrdc4             | 2.16                             |
| Fgfr2            | 4.38                           | Amhr2                | -6.03                              | Agpat4            | -5.20                           | Arsj               | 3.04                             |
| Fhl1             | -6.19                          | Angptl2              | 6.07                               | Agpat9            | -4.30                           | Asap2              | -3.95                            |
| Foxs1            | 6.33                           | Angptl7              | -11.55                             | Ahsp              | 7.43                            | Asna1              | -1.89                            |
| Gas6             | 4.49                           | Ank                  | 7.71                               | Aif1l             | -4.84                           | Asns               | 5.07                             |
| Gata6            | -4.71                          | Ank3                 | 4.31                               | Aifm2             | 2.19                            | Atf5               | 3.07                             |
| Gjc1             | -3.65                          | Ankrd1               | 7.21                               | Aig1              | -2.65                           | Atp1b1             | -4.74                            |

|         |       |          |       |               |       |               |       |
|---------|-------|----------|-------|---------------|-------|---------------|-------|
| Gli2    | -3.47 | Anxa6    | -2.43 | Akr1c18       | -5.01 | Atp6v0e2      | -3.12 |
| Gpr149  | -7.72 | Aox3     | -4.49 | Akt3          | -4.17 | Atp8b1        | 5.52  |
| Gpr176  | 3.90  | Apbb1ip  | 2.28  | Alad          | 2.02  | Auh           | 2.95  |
| Gpx7    | 3.90  | Ap1p1    | -5.24 | Aldh1a1       | 8.32  | Auts2         | 4.40  |
| Grb10   | -7.26 | Apoc1    | -2.90 | Aldh1a7       | 4.26  | Avpr1a        | -6.04 |
| Hoxc10  | 5.09  | Aqp1     | 5.96  | Aldh3a1       | -5.35 | Axin2         | -2.26 |
| Hoxc9   | 4.28  | Arhgap18 | -2.55 | Aldh6a1       | 3.40  | Bace2         | 4.56  |
| Hspb7   | 4.98  | Arhgap29 | -5.31 | Aldoc         | 5.55  | Bcl2l1        | -3.09 |
| Igfbp2  | 6.32  | Arhgap44 | -2.65 | Amhr2         | 7.33  | Bicc1         | -2.70 |
| Igfbp3  | -4.85 | Arhgef3  | -2.84 | Angpt2        | -4.86 | Blvrb         | 2.07  |
| Igfbp6  | 5.52  | Arhgef6  | 3.73  | Angpt4        | -2.70 | Bmp4          | 2.78  |
| Il16    | 3.99  | Artn     | 5.54  | Angptl2       | -5.61 | Bnc1          | -5.13 |
| Il33    | -3.80 | Asap2    | -2.83 | Ank           | -6.11 | Btbd3         | -2.14 |
| Inmt    | -5.27 | Asns     | 3.83  | Ank3          | -4.76 | Btg1          | 2.13  |
| Irx2    | 4.89  | Atp6v0e2 | -3.34 | Ankrd1        | -6.27 | Bves          | -3.16 |
| Irx3    | 3.98  | Atp8a1   | -3.67 | Ankrd6        | -3.15 | C1qtnf1       | -2.12 |
| Itga11  | 6.87  | Atp9a    | -3.68 | Anpep         | 3.16  | C2            | -2.90 |
| Itga3   | -5.00 | Avil     | 7.28  | Apbb1ip       | -3.62 | C430049B03Rik | 1.97  |
| Kcnk1   | 4.97  | Avpi1    | 2.37  | Aplp1         | 5.98  | Cacna2d1      | 5.01  |
| Kprp    | -5.96 | Axin2    | -4.67 | Apobr         | -3.64 | Car11         | 1.86  |
| Krt19   | -3.47 | B4galnt1 | 3.35  | Apoc1         | 2.57  | Casp14        | -3.01 |
| Lama1   | 4.34  | B4galt4  | -2.74 | Aqp1          | -5.97 | Ccdc68        | -3.18 |
| Lama5   | -4.81 | Bai2     | -6.13 | Areg          | -6.07 | Ccdc85b       | 2.66  |
| Laptm5  | -4.75 | Baiap2l1 | -6.38 | Arhgap44      | 3.15  | Ccdc92        | -2.07 |
| Lmcd1   | 5.43  | BC017158 | -3.77 | Arhgdig       | 5.17  | Ccl7          | 2.84  |
| Lox     | 6.50  | BC096441 | -3.89 | Arsj          | -4.04 | Cd200         | 2.50  |
| Lpar4   | -4.38 | Bcat1    | 6.91  | Asf1a         | 2.00  | Cd44          | -1.85 |
| Lum     | 6.03  | Bcl3     | -3.62 | Asns          | -2.44 | Cdk20         | 2.11  |
| Megf10  | 6.22  | Bdnf     | 2.61  | Asph          | -2.22 | Cdkn2a        | -6.80 |
| Mettl24 | 4.66  | Bex4     | -5.98 | Atg2a         | 2.07  | Cela1         | 2.59  |
| Mmp3    | -6.57 | Bicc1    | -5.65 | Atp10a        | -4.91 | Chchd10       | 4.60  |
| Mrap    | 4.90  | Bicd1    | -2.22 | Atp1b1        | 6.27  | Chst1         | 3.70  |
| Msln    | -5.70 | Bin1     | 3.01  | Atp6v1b2      | 1.91  | Clec2d        | 2.42  |
| Mtap    | -5.84 | Bnc1     | -6.66 | Atp7a         | 2.08  | Clmn          | -2.04 |
| Nes     | -5.42 | Bok      | 2.77  | Atp8a1        | 3.76  | Clmp          | 3.32  |
| Nid1    | -7.24 | Bsdc1    | -2.30 | Atp9a         | 2.91  | Cln3          | -2.95 |
| Nipal1  | -4.02 | Btbd3    | -2.70 | Avpi1         | -2.93 | Cln6          | -1.90 |
| Nol3    | -4.19 | C1qtnf1  | -4.38 | Avpr1a        | 3.46  | Cntnap4       | 3.57  |
| Notch4  | -4.47 | C1qtnf2  | -4.51 | Axin2         | 4.89  | Cobl          | -3.73 |
| Nrep    | 4.34  | C1s      | -3.93 | B3gnt9        | 2.98  | Cobll1        | -3.17 |
| Pawr    | 3.89  | C2       | -7.87 | B4galt4       | 2.91  | Col15a1       | 3.84  |
| Pcdh7   | -6.06 | C3       | -8.00 | B930041F14Rik | 2.68  | Col4a1        | -3.47 |
| Pcsk9   | -5.86 | Cables1  | -3.60 | Baalc         | -2.89 | Col4a2        | -3.47 |
| Pkia    | -4.58 | Cadm1    | -5.52 | Bai2          | 5.51  | Col4a6        | -3.29 |
| Pknox2  | -3.78 | Capg     | 4.09  | Baiap2l1      | 4.01  | Col8a1        | -1.98 |
| Plxdc1  | 5.98  | Car11    | -5.20 | BC017158      | 3.92  | Cotl1         | 2.17  |
| Podnl1  | 3.62  | Car9     | -6.63 | BC096441      | 3.97  | Cox6a2        | 4.68  |
| Ptgis   | 5.02  | Card10   | -4.53 | Bcat1         | -5.20 | Cpz           | -4.85 |
| Ptn     | 5.81  | Carhsp1  | -2.26 | Bcl3          | 4.44  | Crabp1        | 5.98  |
| Ptprd   | 5.16  | Cav2     | 4.15  | Bend6         | -1.70 | Crim1         | -2.84 |

|           |       |          |       |          |       |            |       |
|-----------|-------|----------|-------|----------|-------|------------|-------|
| Ptprn     | -3.17 | Ccdc92   | -6.47 | Bex4     | 5.72  | Csgalnact1 | 3.32  |
| Raet1b    | -6.26 | Ccnd1    | 2.98  | Bgn      | 1.94  | Cth        | 3.43  |
| Raet1c    | -6.14 | Ccne2    | 2.00  | Bicc1    | 6.67  | Cyba       | -1.90 |
| Rcn3      | 4.14  | Ccpg1    | -2.56 | Bin1     | -1.95 | Cyp11b1    | -2.43 |
| Rgs16     | -6.75 | Cd109    | 5.32  | Bmf      | 2.01  | Cyp2s1     | -2.92 |
| Rhoj      | -3.13 | Cd200    | -5.21 | Bmp4     | 4.19  | D8Ert82e   | -3.48 |
| Ror2      | 5.27  | Cd276    | 5.33  | Bnc1     | 4.41  | Dap        | 2.52  |
| Serpine2  | 4.25  | Cd44     | 3.59  | Bnc2     | 2.62  | Ddc        | -4.99 |
| Shox2     | 3.14  | Cd55     | -7.19 | Bok      | -2.41 | Ddit4      | 2.06  |
| Slc40a1   | 4.02  | Cd59a    | -2.40 | Bscl2    | 2.11  | Ddr1       | -3.30 |
| Snca      | -4.95 | Cd82     | -1.85 | Btbd11   | -4.59 | Ddx49      | -2.38 |
| Srpx2     | 7.05  | Cd9      | 2.49  | Bves     | -2.61 | Deptor     | 3.38  |
| Stc1      | -5.91 | Cda      | 3.81  | C1qtnf2  | 4.26  | Dgat2      | 2.17  |
| Sybu      | 3.33  | Cdc42ep2 | -2.80 | C2       | 8.44  | Dhrs7      | 1.91  |
| Tenm3     | -5.05 | Cdc42ep4 | 1.92  | C3       | 8.07  | Dkk3       | 5.19  |
| Thbd      | 4.75  | Cdh11    | -2.24 | Cables1  | 6.43  | Dmkn       | -3.65 |
| Thbs2     | 3.47  | Cdh13    | 4.35  | Cacnb3   | 1.82  | Dmrta2     | 4.72  |
| Thy1      | -3.41 | Cdk5r1   | 2.22  | Camkk1   | -2.73 | Dnajc6     | -5.05 |
| Tnc       | -3.23 | Cdkn2a   | -6.21 | Capg     | -4.57 | Dnmt3l     | 3.68  |
| Tnfrsf11b | 5.30  | Cdkn2b   | -5.14 | Capn6    | 4.45  | Dpt        | 5.33  |
| Tnfrsf26  | -5.50 | Cers4    | -3.18 | Car11    | 5.20  | Dram1      | 3.87  |
| Tpd52     | -3.54 | Ces2g    | -5.56 | Car13    | -1.80 | E2f4       | -2.00 |
| Vat1l     | -2.94 | Chi3l1   | -3.52 | Car5b    | -3.96 | Ear2       | -3.45 |
| Wisp2     | 8.46  | Chmp4c   | -2.85 | Car9     | 5.38  | Ear3       | -5.64 |
|           |       | Chst15   | 4.45  | Card10   | 2.63  | Ear4       | -4.87 |
|           |       | Chst3    | 4.27  | Cav2     | -4.63 | Edn1       | -2.97 |
|           |       | Chst7    | 3.84  | Cbr1     | 2.07  | Ednra      | -3.45 |
|           |       | Cish     | -5.48 | Cbr2     | -2.76 | Efna5      | -1.89 |
|           |       | Clcn2    | -4.01 | Cbr3     | 3.44  | Eif3d      | 1.77  |
|           |       | Clcn3    | -3.31 | Ccdc64   | 3.57  | Eif4e3     | 5.02  |
|           |       | Cldn15   | -7.28 | Ccdc80   | 7.06  | Eif4ebp2   | -1.85 |
|           |       | Clip4    | -3.06 | Ccdc85b  | -4.78 | Elavl2     | 3.22  |
|           |       | Clmp     | 4.09  | Ccdc92   | 3.68  | Emb        | 5.59  |
|           |       | Cmtm4    | 3.26  | Ccl27a   | 4.02  | Emp2       | 2.64  |
|           |       | Cnn2     | 3.87  | Ccnd1    | -3.44 | En1        | 3.74  |
|           |       | Cnrip1   | 4.70  | Ccne1    | -1.93 | Enpp2      | 6.58  |
|           |       | Cntnap2  | -7.84 | Ccne2    | -2.32 | Epb4.113   | 4.01  |
|           |       | Cntnap4  | 3.64  | Cd109    | -4.90 | Epb4.114a  | -4.26 |
|           |       | Col12a1  | 2.55  | Cd200    | 6.04  | Epb4.115   | -2.56 |
|           |       | Col15a1  | 5.99  | Cd276    | -4.00 | Eps8l2     | -3.20 |
|           |       | Col1a1   | 2.89  | Cd34     | -2.77 | Ercc2      | -2.31 |
|           |       | Col4a1   | -6.21 | Cd44     | -4.24 | Esrp2      | -2.13 |
|           |       | Col4a2   | -5.67 | Cd55     | 7.45  | Etl4       | -4.61 |
|           |       | Col4a5   | -1.88 | Cd59a    | 2.23  | Etv1       | 4.55  |
|           |       | Col5a1   | 2.25  | Cd9      | -2.58 | F11r       | -3.28 |
|           |       | Col6a3   | 7.38  | Cd93     | -4.19 | Fam110a    | -1.87 |
|           |       | Col8a1   | 7.84  | Cd97     | -3.02 | Fam132b    | -2.41 |
|           |       | Cpne4    | -4.21 | Cda      | -6.63 | Fam180a    | -4.89 |
|           |       | Cpne8    | -8.57 | Cdc25c   | -2.31 | Fam19a5    | 4.04  |
|           |       | Cpz      | -6.57 | Cdc42ep4 | -1.99 | Fam213b    | -3.07 |

|         |       |          |       |         |       |
|---------|-------|----------|-------|---------|-------|
| Crabp1  | 6.94  | Cdc42ep5 | 1.87  | Fam65b  | -2.21 |
| Creg1   | -3.91 | Cdh11    | 3.13  | Fam69c  | 3.28  |
| Crip2   | 3.14  | Cdh13    | -5.56 | Fbln1   | 4.05  |
| Crif1   | 4.68  | Cdh26    | -3.03 | Fbxl13  | 2.68  |
| Crls1   | 2.93  | Cdh3     | 5.50  | Fcgr4   | -3.07 |
| Cryl1   | -4.84 | Cdkn2a   | 5.44  | Fetub   | 2.47  |
| Crym    | -2.50 | Cdon     | 4.27  | Fgf7    | 5.18  |
| Csad    | -2.60 | Cdsn     | -6.86 | Fgf9    | -2.66 |
| Csdc2   | -2.88 | Cebpb    | 2.01  | Fgfr2   | -2.55 |
| Cspg4   | 4.28  | Cela1    | -3.62 | Fgfr1   | -1.97 |
| Csrp2   | 2.22  | Celf4    | -2.55 | Fmn12   | 2.51  |
| Ctf1    | -3.99 | Celsr1   | 2.18  | Foxred2 | 2.28  |
| Cthrc1  | 4.05  | Cenpn    | -1.88 | Fry     | -2.44 |
| Ctsa    | 4.87  | Cenpt    | -2.00 | Fscn1   | -2.76 |
| Ctsc    | -3.83 | Cercam   | 5.80  | Fzd7    | -2.24 |
| Ctsf    | -4.84 | Ces2g    | 4.65  | Gabrb1  | -6.04 |
| Ctsh    | -5.12 | Ch25h    | -3.53 | Galc    | -2.52 |
| Ctsk    | 6.08  | Chchd10  | 7.65  | Galnt18 | 3.80  |
| Ctsl    | -3.20 | Chd7     | -2.87 | Gas6    | -3.49 |
| Ctxn1   | -3.86 | Chic1    | -2.83 | Gata3   | 3.03  |
| Cxcl12  | 4.82  | Chmp4c   | 2.25  | Gata6   | -1.93 |
| Cyb5    | -2.33 | Chn2     | 3.63  | Gatsl2  | -2.27 |
| Cygb    | -3.38 | Chst1    | -5.40 | Gdap11  | 2.92  |
| Cyp2s1  | -5.03 | Chst2    | -5.10 | Gdnf    | 2.11  |
| Cyp7b1  | -5.00 | Chst7    | -3.45 | Gfod1   | 2.77  |
| Dak     | -3.26 | Chst8    | -3.72 | Glce    | 2.33  |
| Dcbl2   | -2.76 | Chtf18   | -1.84 | Glipr1  | 2.65  |
| Dclk1   | -3.71 | Cish     | 4.61  | Glipr2  | 1.84  |
| Dcn     | -4.26 | Clcn2    | 4.61  | Glis2   | -1.93 |
| Ddc     | -6.43 | Cldn15   | 7.29  | Gm129   | 2.84  |
| Ddit4   | -2.38 | Cldn23   | -4.21 | Gm13154 | 3.67  |
| Ddr1    | -5.37 | Clip4    | 4.17  | Gm5796  | 2.05  |
| Dhrs4   | -2.56 | Clmp     | -2.19 | Gm7094  | 1.78  |
| Diras1  | 3.51  | Cmtm7    | 1.75  | Gmnds   | 2.78  |
| Dlgap4  | -2.09 | Cnn2     | -4.31 | Gmip    | -1.91 |
| Dlk2    | 4.30  | Cnrip1   | -5.45 | Gnaz    | 2.56  |
| Dlx1    | 2.85  | Cntnap2  | 8.12  | Gng2    | 3.17  |
| Dnajc6  | -4.25 | Cntnap4  | -3.48 | Gpc1    | 3.13  |
| Dnase2a | -4.88 | Col16a1  | 2.09  | Gpr149  | 6.17  |
| Dnd1    | -3.08 | Col18a1  | -5.24 | Gpr165  | -2.23 |
| Dnm3os  | 2.39  | Col4a1   | 2.05  | Gpt2    | 2.34  |
| Dtwd1   | 2.30  | Col4a2   | 2.63  | Grasp   | 2.42  |
| Dync1i1 | -3.90 | Col4a5   | 3.68  | Greb1   | -2.53 |
| Dysf    | 4.24  | Col4a6   | 3.71  | Grem1   | 3.65  |
| Ebf1    | 3.38  | Col5a1   | -2.12 | Gria3   | 3.33  |
| Ece1    | -2.26 | Col6a3   | -5.12 | Gspt2   | -2.29 |
| Efcab4a | -3.13 | Col7a1   | -3.85 | Gsto2   | -2.12 |
| Efna5   | -3.68 | Col8a1   | -7.82 | Gstt3   | -2.85 |
| Ehbp1l1 | 3.12  | Cpeb3    | 2.33  | Gucy1b3 | -2.09 |
| Ehd2    | 2.11  | Cplx2    | -3.13 | Hal     | -4.45 |

|          |       |               |       |          |       |
|----------|-------|---------------|-------|----------|-------|
| Elmo3    | -4.29 | Cpne8         | 3.48  | Hectd2   | 3.39  |
| Eln      | -8.15 | Cpxm1         | 3.64  | Herpud1  | 2.23  |
| Elovl4   | 2.16  | Cpz           | 5.55  | Hip1     | -1.95 |
| Emb      | 9.33  | Crabp1        | -4.17 | Hnrnp1   | 1.76  |
| Emilin2  | -3.25 | Crct1         | -6.39 | Hoxd9    | 2.77  |
| Eml1     | 5.81  | Creb3         | 2.14  | Hs3st1   | -2.67 |
| Emp1     | 6.09  | Creb3l1       | 3.17  | Hs3st3a1 | -3.55 |
| Eno3     | 6.90  | Crebl2        | 2.29  | Hspb6    | 2.55  |
| Enox1    | 4.66  | Creg1         | 3.31  | Htra1    | 5.67  |
| Enpp1    | 5.45  | Crip2         | -3.25 | Igf2     | -3.17 |
| Enpp5    | -3.53 | Crls1         | -2.76 | Igfbp3   | -2.95 |
| Epb4.113 | -6.54 | Crmp1         | -3.87 | Igfbp4   | -4.02 |
| Epb4.115 | -4.02 | Cryl1         | 4.35  | Igfbp5   | 4.38  |
| Epha3    | 5.81  | Csf2ra        | 1.91  | Il18     | -3.82 |
| Epha7    | -2.61 | Csk           | -1.84 | Inadl    | -3.19 |
| Ephb4    | -2.42 | Csprs         | -4.99 | Isl1     | 5.94  |
| Ephb6    | -2.16 | Ctdspl        | 2.26  | Islr     | 3.71  |
| Ephx4    | -2.45 | Ctf1          | 5.65  | Itfg3    | -1.80 |
| Esyt3    | -6.03 | Ctsa          | -2.49 | Itga11   | 4.19  |
| Exoc3l   | -2.32 | Ctsf          | 5.33  | Itga3    | -4.97 |
| F11r     | -6.21 | Ctsh          | 4.96  | Itga7    | -5.10 |
| F2r      | 4.92  | Ctsl          | 2.38  | Itm2a    | 5.46  |
| Faah     | -3.67 | Ctxn1         | 2.78  | Ivl      | -8.24 |
| Fads6    | -6.81 | Cxadr         | 2.62  | Jph2     | -3.58 |
| Fam110c  | -7.26 | Cxcl16        | 6.76  | Kank4    | -3.28 |
| Fam111a  | 2.57  | Cygb          | 4.94  | Kcnk5    | -5.34 |
| Fam115c  | -3.58 | Cyhr1         | 2.39  | Kcp      | -2.19 |
| Fam129a  | 4.24  | Cyp2s1        | 6.42  | Kctd1    | -2.04 |
| Fam129b  | 4.51  | Cyp7b1        | 2.54  | Kctd12   | 5.73  |
| Fam132b  | 5.34  | Cytip         | -2.54 | Khdrbs3  | 3.59  |
| Fam171a1 | 3.41  | D630004N19Rik | 2.08  | Khk      | -1.86 |
| Fam210b  | -3.19 | Dag1          | 2.07  | Klf2     | -2.29 |
| Fam212b  | -2.12 | Dak           | 3.51  | Klhl30   | -4.29 |
| Fam213a  | -3.18 | Dclk1         | 2.66  | Kprp     | 3.92  |
| Fam213b  | -3.67 | Dcn           | 4.87  | Krt19    | -3.83 |
| Fam49a   | -7.31 | Ddc           | 6.41  | Lama5    | -5.01 |
| Fam84b   | -4.52 | Ddit4l        | 4.13  | Lck      | 2.18  |
| Fap      | 2.71  | Ddo           | 2.72  | Lgi2     | 4.17  |
| Fblim1   | 3.61  | Ddr1          | 3.77  | Limch1   | -6.74 |
| Fbln1    | -4.34 | Depdc1b       | -2.30 | Ligl2    | -2.95 |
| Fbn1     | 4.80  | Dgat2         | -2.52 | Lpar4    | 5.51  |
| Fbxo2    | -5.30 | Dhrs4         | 2.40  | Lrp12    | 1.80  |
| Fchsd1   | -4.51 | Dhrs9         | -1.84 | Lrp2     | -6.71 |
| Fgf10    | 4.96  | Dlgap5        | -1.66 | Lrp8     | 2.74  |
| Fgf7     | 5.64  | Dlx1          | -2.40 | Lrrc59   | 3.55  |
| Fhl1     | -5.60 | Dmxl1         | 1.75  | Lrrc8a   | 2.10  |
| Fhl2     | 3.18  | Dnase2a       | 5.35  | Lrrc8d   | -2.04 |
| Figf     | 3.15  | Dnph1         | -2.15 | Lrrn4    | -6.54 |
| Flrt1    | -5.03 | Dusp15        | 2.21  | Ltbp3    | -2.18 |
| Flt1     | 7.54  | Dusp7         | -2.63 | Lurap1l  | 2.43  |

|         |       |               |       |          |       |
|---------|-------|---------------|-------|----------|-------|
| Flywch2 | -2.36 | Dync1i1       | 3.82  | Ly6c1    | 4.52  |
| Fmnl2   | 3.44  | Dysf          | -5.58 | Ly6e     | 2.28  |
| Fmnl3   | 4.40  | E130012A19Rik | -3.21 | Lypd1    | -3.84 |
| Folr1   | -8.07 | E130308A19Rik | 2.79  | Maats1   | 3.80  |
| Foxg1   | 2.15  | E330009J07Rik | 2.36  | Man2b2   | -2.66 |
| Foxs1   | 4.15  | Ece1          | 2.32  | Map1b    | 1.84  |
| Frmd7   | -5.02 | Efnb1         | 2.63  | Map2     | 3.69  |
| Fscn1   | 2.91  | Ehbp1l1       | -3.29 | Map3k14  | 2.41  |
| Fuom    | -2.85 | Ehd2          | -2.93 | Map3k7cl | -3.95 |
| Fut10   | 2.12  | Eif4ebp1      | -2.04 | Mapk8ip1 | -2.53 |
| Fxyd1   | -2.41 | Elk3          | -2.43 | Mb21d1   | 2.72  |
| Galnt18 | 3.01  | Elmo3         | 3.91  | Mboat2   | -3.85 |
| Garnl3  | -4.50 | Eln           | 8.23  | Mbp      | -1.99 |
| Gas6    | -4.34 | Elovl4        | -2.17 | Med14    | 1.85  |
| Gata3   | -2.90 | Elovl6        | -3.05 | Med30    | 1.94  |
| Gata4   | -2.97 | Emb           | -5.76 | Mef2c    | 3.10  |
| Gata6   | -9.21 | Emilin2       | 2.08  | Megf10   | 2.73  |
| Gatsl2  | -2.49 | Eml1          | -5.42 | Metrn1   | -2.21 |
| Gdnf    | 4.85  | Emp1          | -6.11 | Mettl20  | -3.18 |
| Gdpd5   | -3.61 | Eng           | -4.72 | Mfap2    | 4.97  |
| Ggt5    | -3.81 | Eno3          | -6.06 | Mgarp    | 3.84  |
| Gjb3    | -5.51 | Enpp2         | 3.66  | Mgll     | -6.24 |
| Glipr1  | 6.02  | Enpp4         | 2.74  | Mid1ip1  | -1.88 |
| Glipr2  | 5.46  | Entpd5        | 1.89  | Mlf1     | 2.79  |
| Glrx2   | -2.57 | Epb4.1l5      | 2.49  | Mllt4    | -2.40 |
| Gm12538 | -3.30 | Eps8l2        | 4.35  | Mmp11    | 2.28  |
| Gm22    | 6.42  | Erich1        | 2.13  | Mmp16    | 2.24  |
| Gm2a    | -3.79 | Erlin1        | -2.20 | Mmp9     | 2.92  |
| Gm3579  | -3.87 | Esm1          | -6.49 | Mn1      | -2.17 |
| Gm4672  | 5.46  | Esyt3         | 5.89  | Mogat2   | -3.45 |
| Gmpr    | -2.89 | Etv1          | -4.33 | Mreg     | -4.56 |
| Gnai1   | -3.85 | Evi2a         | -4.55 | Ms4a2    | -6.21 |
| Gng2    | 3.22  | Evi2a-evi2b   | -2.09 | Ms4a6d   | -4.37 |
| Golm1   | -2.63 | Exoc6         | 2.51  | Msln     | -6.05 |
| Gpc1    | 5.15  | F11r          | 4.44  | Mtbp     | 3.34  |
| Gpr176  | 7.97  | F2r           | -5.42 | Mthfd2   | 2.45  |
| Gpr64   | -2.21 | F2rl1         | -3.45 | Mtus1    | -3.05 |
| Gpx7    | 4.63  | Faah          | 4.83  | Murc     | 2.55  |
| Gramd1b | -2.30 | Fads3         | -2.72 | Myl7     | -4.11 |
| Greb1   | -4.77 | Fads6         | 7.18  | Nabp2    | -2.15 |
| Grem1   | 7.19  | Fahd2a        | 2.55  | Nap1l1   | -2.00 |
| Gria3   | -3.33 | Fam107b       | -2.77 | Nfatc4   | 3.24  |
| Gsta3   | -7.17 | Fam110c       | 3.33  | Nfib     | 4.80  |
| Gstm2   | -4.17 | Fam111a       | -2.97 | Ngfr     | 2.71  |
| Gsto1   | 4.99  | Fam115c       | 3.96  | Nhs1     | -2.09 |
| Gstt3   | -3.68 | Fam117a       | 2.28  | Nkain2   | -2.52 |
| Gucy1a3 | -7.08 | Fam126a       | 2.77  | Nme7     | -4.79 |
| H1fx    | 2.56  | Fam129b       | -4.53 | Nod1     | -2.08 |
| H2-DMb1 | -5.20 | Fam13c        | 5.19  | Nrep     | 3.49  |
| H2-DMb2 | -4.92 | Fam171a1      | -2.90 | Nrn1     | 3.61  |

|          |       |           |       |         |       |
|----------|-------|-----------|-------|---------|-------|
| Haghl    | -2.17 | Fam180a   | 5.23  | Nupr1   | 3.10  |
| Hapln4   | 3.24  | Fam212a   | -1.99 | Ociad2  | -2.23 |
| Hlcs     | -3.03 | Fam221a   | 2.46  | Ogfrl1  | 2.32  |
| Hmga1    | 7.57  | Fam49a    | 7.24  | Osr1    | 2.97  |
| Hopx     | 2.98  | Fam57a    | -2.30 | Osr2    | 2.75  |
| Hoxa7    | 2.26  | Fam64a    | -2.42 | Otub2   | 2.42  |
| Hoxc9    | 2.44  | Fam84b    | 3.80  | P2ry1   | 5.53  |
| Hoxd10   | -5.08 | Far1      | -1.70 | Pald1   | -2.25 |
| Hr       | -3.40 | Fas       | 3.53  | Pald    | -2.76 |
| Hs3st1   | -4.35 | Fblim1    | -6.03 | Pcbp3   | 1.96  |
| Hspb8    | -3.80 | Fbn1      | -3.83 | Pcdh17  | 4.34  |
| Icam1    | -5.55 | Fbrsl1    | 1.91  | Pcdhb22 | 1.87  |
| Igf1     | -4.92 | Fbxo2     | 6.13  | Pcsk9   | 5.28  |
| Igf1r    | 3.27  | Fchsd1    | 4.38  | Pde3a   | -2.70 |
| Igfbp3   | -7.55 | Fdxr      | 2.86  | Pde6h   | -3.52 |
| Igfbp5   | -5.07 | Fez1      | -2.89 | Pdgfc   | 3.18  |
| Igsf9    | -4.27 | Fgf10     | -4.44 | Peg3    | -4.25 |
| Il11ra1  | -2.29 | Fgf18     | 3.68  | Phf11d  | 2.76  |
| Il13ra1  | -3.44 | Fgf7      | -4.19 | Pid1    | 4.26  |
| Il17re   | -7.83 | Fgf9      | 3.36  | Piezo2  | -2.79 |
| Il1rl1   | 8.04  | Fgfr1op2  | 3.69  | Pik3cb  | -2.30 |
| Ilvbl    | -2.74 | Fgfr2     | 4.25  | Pik3r1  | 2.39  |
| Inhba    | 5.62  | Fhdc1     | 2.48  | Pim1    | -3.58 |
| Irx2     | 4.80  | Fign      | -3.51 | Pitpnm2 | -2.53 |
| Irx3     | 2.61  | Flnb      | -2.91 | Pkp2    | -2.07 |
| Isyna1   | -3.37 | Flrt1     | 5.45  | Pla1a   | 4.64  |
| Itfg3    | -3.24 | Flrt3     | -4.25 | Plac8   | 2.49  |
| Itga11   | 7.25  | Flt1      | -7.79 | Plekhj1 | -2.45 |
| Itga3    | -4.79 | Flywch2   | 2.89  | Plvap   | 1.98  |
| Itga7    | -2.79 | Fmnl2     | -3.52 | Pogk    | 2.30  |
| Itgb1bp1 | -3.31 | Fmnl3     | -4.04 | Polr2a  | -2.38 |
| Itgb1l   | 6.90  | Folr1     | 8.70  | Popdc3  | -3.81 |
| Itm2a    | -7.22 | Fosl2     | 1.89  | Ppp1r3c | 2.71  |
| Itpr1    | -2.98 | Frmd4a    | -2.85 | Ppp2r2b | -7.08 |
| Itprlp   | 2.27  | Frmd7     | 4.36  | Prcp    | 1.89  |
| Ivl      | -4.87 | Fry       | 3.62  | Prelp   | 3.71  |
| Izumo4   | -2.78 | Fscn1     | -3.14 | Prkar2b | 3.77  |
| Jmjd8    | -3.03 | Fxyd5     | -4.93 | Pros1   | 3.44  |
| Jph1     | -5.09 | Fzd4      | 1.98  | Prr5l   | -3.74 |
| Kank1    | -2.25 | Gabarapl1 | 1.90  | Prss23  | -1.84 |
| Katnb1   | 2.06  | Gadd45a   | 3.03  | Psmb8   | 2.23  |
| Kcnab1   | -8.76 | Gadd45b   | 4.69  | Ptn     | 7.42  |
| Kcnn4    | 5.60  | Gadd45g   | -1.75 | Ptpn21  | -1.88 |
| Kcp      | -4.24 | Gal3st2   | 3.79  | Ptprf   | -2.98 |
| Kdelr3   | 2.90  | Garnl3    | 2.98  | Pycr1   | 2.90  |
| Kirrel3  | 3.63  | Gas6      | 8.84  | Qpct    | 2.85  |
| Klhl30   | 4.16  | Gata4     | 3.70  | Rab15   | 4.19  |
| Klra33   | 7.20  | Gata6     | 4.50  | Rab27a  | -2.04 |
| Klra4    | 6.58  | Gatsl3    | -2.30 | Rab3il1 | 2.38  |
| Kremen1  | 2.45  | Gca       | 3.63  | Ramp2   | 3.74  |

|          |       |         |       |           |       |
|----------|-------|---------|-------|-----------|-------|
| Krt19    | -7.82 | Gchfr   | -4.92 | Rarres2   | -3.09 |
| Krt7     | -8.48 | Gcnt1   | 3.34  | Rasgrp1   | -3.55 |
| Krt8     | -6.33 | Gdnf    | -5.21 | Rasgrp3   | -7.56 |
| Krtcap3  | -2.11 | Gdpd1   | 2.43  | Rasl11a   | -3.06 |
| Lamb2    | -2.26 | Gdpd3   | 2.28  | Rbbp4     | 2.11  |
| Lamc3    | -3.06 | Gdpd5   | 3.46  | Rerg      | 3.18  |
| Ldhd     | -2.22 | Gemin6  | -1.66 | Rftn2     | 2.64  |
| Ldoc1l   | -3.44 | Ggt5    | 3.61  | Rgs12     | -2.04 |
| Lefty1   | -1.84 | Ggt7    | -2.70 | Rgs17     | 2.46  |
| Lgals2   | -5.36 | Ggta1   | -2.12 | Rhobtb1   | 2.65  |
| Lgals7   | -4.46 | Gimap9  | 2.63  | Rhobtb3   | 1.97  |
| Lhpp     | -2.82 | Gjc1    | -3.89 | Rnf144a   | 5.25  |
| Limch1   | -5.13 | Glce    | -2.99 | Rnf19a    | 1.91  |
| Llgl2    | -2.52 | Gli2    | -2.18 | Robo1     | 5.82  |
| Lox      | 2.22  | Glipr1  | -5.52 | Ror2      | 1.97  |
| Lpar2    | -3.83 | Glipr2  | -6.64 | Rrad      | 1.96  |
| Lpl      | -6.01 | Glt8d2  | -4.10 | Runx1t1   | 4.62  |
| Lrba     | -4.49 | Gm12538 | 3.21  | Sbf1      | 1.83  |
| Lrp2     | -6.05 | Gm14680 | -2.22 | Sbsn      | -2.35 |
| Lrp8     | 5.53  | Gm22    | -3.90 | Scrn1     | -2.73 |
| Lrrk2    | 3.77  | Gm2a    | 4.19  | Sema3b    | -2.07 |
| Lrrn4    | -7.11 | Gm3579  | 4.01  | Sema3e    | -2.68 |
| Ltbp1    | 6.32  | Gm4672  | -4.65 | Sema3f    | -4.78 |
| Lurap1l  | 6.46  | Gm5077  | 3.77  | Sema5a    | 4.07  |
| Lypd1    | -5.81 | Gm8909  | -3.53 | Serpina3g | 3.32  |
| Lysmd2   | 2.54  | Gmpr    | 3.76  | Serpina3n | 4.91  |
| Lyz1     | -9.03 | Gnai1   | 5.75  | Serpine2  | 5.80  |
| Maats1   | 4.62  | Gnb1    | -1.67 | Serpinf1  | 3.90  |
| Mageh1   | -2.11 | Gnb4    | -4.22 | Serping1  | -3.51 |
| Map3k1   | -2.51 | Gng11   | -2.50 | Sft2d2    | -4.30 |
| Map7     | -5.79 | Gng2    | -3.24 | Sgsm1     | -2.28 |
| Mapk13   | -3.71 | Gng7    | 1.74  | Sh3tc1    | -2.79 |
| Mapk8    | -2.50 | Gnpda1  | 1.78  | Sh3tc2    | -3.47 |
| Mapkapk2 | -3.13 | Golm1   | 1.81  | Shmt2     | 1.93  |
| Mapkapk3 | -4.13 | Gpc1    | -4.02 | Sirpa     | 2.20  |
| Masp1    | 7.92  | Gpr124  | -3.52 | Six1      | 3.00  |
| Mboat2   | -2.65 | Gpr149  | -7.48 | Slc1a4    | 2.71  |
| Mcam     | -2.07 | Gpr176  | -4.07 | Slc27a6   | 3.63  |
| Mcm5     | 2.19  | Gpr180  | 1.77  | Slc2a13   | 3.49  |
| Mef2c    | 5.44  | Gpr64   | 3.24  | Slc6a9    | 3.21  |
| Megf10   | 7.92  | Grasp   | -3.32 | Slc7a11   | 5.78  |
| Megf9    | -2.90 | Grb10   | -5.83 | Slc8a1    | 3.89  |
| Mela     | -3.50 | Grem1   | -6.63 | Slc9a3r1  | -5.21 |
| Melk     | 1.98  | Grhpr   | 2.04  | Slc9a3r2  | -2.61 |
| Mettl24  | 2.89  | Gria3   | 3.34  | Smim1     | -3.74 |
| Mgat3    | -4.55 | Grk6    | -1.88 | Smpd3     | -3.97 |
| Mgmt     | -6.79 | Gspt2   | -3.70 | Snca      | 2.81  |
| Mical1   | 3.69  | Gsta3   | 7.46  | Snta1     | -2.45 |
| Mif4gd   | -3.85 | Gstm1   | 3.24  | Snurf     | -3.98 |
| Mkrn1    | -2.36 | Gstm2   | 5.07  | Sort1     | -2.47 |



|            |       |           |       |          |       |
|------------|-------|-----------|-------|----------|-------|
| Mmd        | -3.04 | Gstm6     | 2.16  | Sox4     | -1.88 |
| Mmp17      | -4.08 | Gsto1     | -5.92 | Sox9     | 6.05  |
| Mmp2       | 8.61  | Gstt1     | 2.50  | Spint1   | -4.39 |
| Mocs1      | -2.16 | Gstt3     | 3.09  | Sprr1a   | -2.25 |
| Mospd1     | -2.05 | Gucy1a3   | 6.84  | Srpx2    | 6.60  |
| Mrgprf     | 2.62  | Gulp1     | 2.04  | Ssh1     | -1.97 |
| Mrv1       | -3.55 | H2-D1     | -3.77 | Stab1    | 2.12  |
| Msr2       | -3.88 | H2-DMb1   | 4.77  | Stim1    | -2.52 |
| Mtap       | -4.53 | H2-DMb2   | 4.69  | Stx3     | -2.30 |
| Mthfd2     | 4.27  | H2-M3     | -2.94 | Sulf2    | 1.90  |
| Muc16      | -9.14 | H60a      | -5.54 | Sybu     | 4.48  |
| Murc       | 5.32  | Hao1      | -4.94 | Tagap    | -3.99 |
| Mustn1     | 4.26  | Havcr2    | -4.40 | Tagap1   | -2.86 |
| Mycl       | -3.35 | Hectd2    | -3.77 | Tagln    | -2.48 |
| Myh10      | -5.03 | Hemt1     | -2.53 | Tbc1d2   | -3.70 |
| Myl7       | -2.18 | Hk1       | -2.93 | Tceal6   | -3.15 |
| Myo1b      | 1.93  | Hlcs      | 2.89  | Tdrkh    | 2.74  |
| Myo5b      | -7.39 | Hmga1     | -7.46 | Tec      | -3.72 |
| Myo7a      | -3.47 | Hmga2-ps1 | -4.06 | Tenm4    | 2.99  |
| Naprt1     | -3.47 | Hmox1     | 2.48  | Tescl    | -2.85 |
| Ncam1      | 4.12  | Hook2     | 2.13  | Tgfb1    | -1.79 |
| Ncrna00085 | -3.07 | Hoxc10    | 3.66  | Tgfb1    | 6.21  |
| Ncs1       | 2.09  | Hoxc6     | 2.70  | Tiam1    | -3.28 |
| Ndfip1     | -2.52 | Hoxd10    | 5.50  | Timp3    | -3.10 |
| Nes        | -3.42 | Hoxd3     | 2.75  | Tinagl1  | -3.08 |
| Neu2       | -2.23 | Hoxd4     | 3.80  | Tmc6     | -3.25 |
| Nfatc1     | 3.37  | Hoxd8     | 2.72  | Tmem100  | 5.47  |
| Nfe2l3     | -4.15 | Hoxd9     | 3.21  | Tmem154  | -2.12 |
| Ngef       | 4.92  | Hs3st1    | 5.48  | Tmem176a | -2.29 |
| Nid2       | -4.19 | Hspb1     | 3.37  | Tmem180  | -2.73 |
| Nipal2     | -2.64 | Hspb7     | 2.57  | Tmem200a | 3.58  |
| Nkain1     | 2.61  | Hspb8     | 4.15  | Tmem255a | -3.64 |
| Nme3       | -2.67 | Htr2b     | 2.12  | Tmem47   | 5.24  |
| Nme7       | -2.37 | Hyi       | 2.51  | Tmem62   | -2.09 |
| Nos3       | -2.84 | Icam1     | 5.62  | Trnp1    | -2.07 |
| Nostrin    | 3.28  | Iffo2     | -2.41 | Tns4     | -3.56 |
| Nrep       | 3.30  | Ifi202b   | -3.12 | Tpst2    | -2.01 |
| Nuak2      | -4.23 | Ifnlr1    | 2.91  | Trib3    | 5.97  |
| Nudt10     | -3.63 | Igdcc4    | 5.95  | Tril     | 6.26  |
| Nudt4      | 2.06  | Igf1      | 5.00  | Trp63    | 2.81  |
| Nxn        | -2.64 | Igf1r     | -3.71 | Tsc22d3  | 2.14  |
| Nxn2       | -5.88 | Igf2bp2   | -2.39 | Tsc22d4  | -2.69 |
| Oaf        | 2.73  | Igfbp2    | 5.61  | Tspan17  | 5.31  |
| Olfm1      | 3.22  | Igfbp3    | 2.69  | Tspan6   | 4.42  |
| Olfml3     | 3.11  | Igfbp5    | 8.96  | Ttll1    | 1.79  |
| Oplah      | -6.21 | Igfbp6    | 7.22  | Tuft1    | -2.31 |
| Osr1       | 4.42  | Igsf5     | -4.61 | Twist2   | 4.99  |
| P4ha2      | 2.20  | Igsf9     | 4.55  | Usp2     | -2.77 |
| Pank1      | 2.49  | Il11ra1   | 3.81  | Utp23    | 2.18  |
| Papln      | -3.25 | Il15      | -2.55 | Vat1l    | -5.99 |

|          |       |         |       |         |       |
|----------|-------|---------|-------|---------|-------|
| Parm1    | -5.55 | Il16    | 5.03  | Vav3    | 1.89  |
| Pcdh7    | -3.80 | Il17rc  | -2.35 | Vcan    | 3.94  |
| Pdcd4    | -2.48 | Il17re  | 6.84  | Vgll2   | -4.94 |
| Pde1b    | 5.37  | Il18    | 5.13  | Wnt4    | -2.58 |
| Pde4dip  | -5.66 | Il1rap  | -1.93 | Wsb2    | -2.00 |
| Pdgfc    | 4.28  | Il1rl1  | -7.29 | Wwc1    | -2.57 |
| Pdgfra   | 3.90  | Il33    | -2.59 | Wwp1    | -2.29 |
| Pdss1    | 2.60  | Il6ra   | -2.86 | Xkr5    | -2.81 |
| Pdzrn3   | 6.64  | Impdh1  | -2.21 | Xpnpep2 | 2.91  |
| Peg3     | -3.49 | Inhba   | -3.12 | Zbtb7c  | -3.72 |
| Pfkip    | 3.95  | Inmt    | -4.37 | Zbtb8b  | -3.22 |
| Pgf      | 2.37  | Irf5    | 4.25  | Zcchc6  | 4.42  |
| Phgdh    | 3.32  | Isyna1  | 4.50  | Zdhhc14 | -3.12 |
| Phldb2   | -2.44 | Itfg3   | 3.23  | Zfp41   | 2.86  |
| Pik3r3   | -2.68 | Itga6   | -2.85 | Zfpm2   | 1.95  |
| Pip5k1b  | -7.01 | Itga7   | 2.68  |         |       |
| Pkhd1l1  | -7.22 | Itgb7   | -7.40 |         |       |
| Pkia     | -6.27 | Itgb1   | -4.80 |         |       |
| Pknnox2  | -3.81 | Itm2a   | 5.05  |         |       |
| Plau     | 2.45  | Itpka   | 2.09  |         |       |
| Plcl2    | 3.22  | Itpr1   | 3.24  |         |       |
| Plec     | 1.99  | Jph1    | 4.58  |         |       |
| Plekhb1  | -5.34 | Kank1   | 2.85  |         |       |
| Plekhg4  | 2.38  | Katnb1  | -1.71 |         |       |
| Plk1s1   | -3.06 | Kcnab1  | 7.98  |         |       |
| Pltp     | 2.59  | Kcnk1   | 4.89  |         |       |
| Pnpo     | -2.62 | Kcnk2   | -4.10 |         |       |
| Podnl1   | 4.93  | Kcnn4   | -4.60 |         |       |
| Podxl    | -5.35 | Kcnu1   | 2.92  |         |       |
| Pou3f1   | -5.19 | Kcp     | 4.31  |         |       |
| Ppap2b   | -2.45 | Khdrbs3 | -3.51 |         |       |
| Ppap2c   | 2.07  | Kif18a  | -1.99 |         |       |
| Pparg    | 3.63  | Kif3c   | -2.44 |         |       |
| Ppfibp2  | -3.87 | Kirrel3 | -2.34 |         |       |
| Ppp1r13b | -4.40 | Klc4    | 3.06  |         |       |
| Ppp1r26  | -2.80 | Klhl30  | -2.40 |         |       |
| Ppp1r9a  | -6.60 | Klk8    | -4.97 |         |       |
| Ppp2r5b  | -2.82 | Klra33  | -8.42 |         |       |
| Pqlc1    | -3.15 | Klra4   | -7.80 |         |       |
| Prickle1 | -5.30 | Kmt2c   | 1.97  |         |       |
| Prkcd    | -2.42 | Knstrn  | -2.17 |         |       |
| Prr15l   | -5.66 | Kpna2   | -1.71 |         |       |
| Prr7     | 3.96  | Kprp    | -6.22 |         |       |
| Prrg2    | -2.28 | Krt14   | 2.85  |         |       |
| Prrx1    | 3.07  | Krt19   | 4.35  |         |       |
| Prss12   | -4.48 | Krt7    | 8.42  |         |       |
| Psen2    | -3.26 | Krt8    | 6.07  |         |       |
| Ptgis    | -4.03 | Krtcap3 | 2.30  |         |       |
| Ptk2b    | -2.30 | Lamb2   | 2.01  |         |       |
| Ptn      | 6.23  | Ldoc1l  | 5.12  |         |       |

|         |       |          |       |
|---------|-------|----------|-------|
| Ptplad2 | -2.35 | Leprel4  | 2.09  |
| Ptprb   | -3.90 | Lgals2   | 5.75  |
| Ptprd   | -2.15 | Lgals7   | 3.95  |
| Ptprk   | -2.36 | Lgals9   | -2.65 |
| Ptprm   | 3.34  | Lgr6     | -3.06 |
| Ptrh1   | 2.70  | Limch1   | 4.38  |
| Pvrl2   | -4.05 | Lims2    | -2.32 |
| Pxdc1   | 3.10  | Lmo7     | -2.57 |
| Qpct    | 2.18  | Lox      | 4.28  |
| Rab6b   | -4.02 | Loxl1    | 3.62  |
| Rad51c  | 2.17  | Loxl4    | -3.17 |
| Ramp2   | 1.99  | Lpar1    | -2.15 |
| Rap1gap | -3.77 | Lpar2    | 3.86  |
| Rarres2 | -6.98 | Lpar4    | -4.16 |
| Rasl11a | -3.64 | Lpl      | 4.95  |
| Rasl11b | -5.01 | Lrba     | 3.92  |
| Rbm28   | -2.00 | Lrp2     | 5.72  |
| Rbp1    | -6.15 | Lrp8     | -5.66 |
| Rcan2   | -3.73 | Lrrc1    | 2.81  |
| Rcsd1   | -3.51 | Lrrk2    | -5.33 |
| Rell2   | -2.89 | Lrrn4    | 7.09  |
| Rep15   | -3.01 | Ltbp1    | -5.63 |
| Rftn2   | 4.76  | Lurap1l  | -6.00 |
| Rgcc    | 5.58  | Ly6a     | -7.93 |
| Rgs17   | 4.39  | Ly6c1    | -5.89 |
| Rgs7    | 2.43  | Ly75     | -1.88 |
| Rhbdl1  | -4.66 | Lypd1    | 2.35  |
| Rhou    | -3.06 | Lysmd2   | -2.67 |
| Rims2   | 3.57  | Lyz1     | 8.05  |
| Rmnd5b  | -2.20 | Maged2   | 2.68  |
| Rnase4  | -3.90 | Mageh1   | 2.64  |
| Rnf130  | -6.08 | Map3k1   | 2.60  |
| Rnf150  | 2.41  | Map6     | -3.80 |
| Rnf182  | -3.46 | Map7     | 5.91  |
| Ror2    | 4.13  | Mapk11   | -2.49 |
| Rora    | -2.45 | Mapk8    | 2.15  |
| Rpp25   | -4.83 | Mapkapk2 | 2.97  |
| Rsph1   | -4.72 | Mapkapk3 | 1.94  |
| Rtkn2   | 3.00  | Marcks1  | 2.72  |
| Rtn1    | -6.18 | Mars2    | -2.03 |
| S100a1  | -4.41 | Marveld1 | -2.40 |
| Saa3    | -7.13 | Masp1    | -5.18 |
| Satb1   | -4.80 | Mb21d1   | -3.11 |
| Sbk1    | -2.60 | Mbd1     | 2.15  |
| Scamp5  | -4.24 | Mbp      | 6.82  |
| Scara3  | 8.26  | Mcc      | 2.11  |
| Scg5    | -3.83 | Mcm5     | -1.66 |
| Sdf4    | -2.20 | Mdh1     | 1.73  |
| Sdsl    | -4.96 | Mef2c    | -4.20 |
| Selp    | -2.60 | Megf9    | 3.53  |

|           |       |            |       |
|-----------|-------|------------|-------|
| Sema3f    | -5.04 | Mela       | 3.77  |
| Sema5a    | 4.38  | Melk       | -2.07 |
| Sema7a    | 6.20  | Mesdc1     | 2.16  |
| Sepp1     | -4.79 | Metrn      | -4.78 |
| 5-Sep     | 2.29  | Mettl20    | 3.32  |
| Serinc3   | -2.02 | Mex3a      | 1.80  |
| Serpinb1a | -2.67 | Mfap3l     | -3.76 |
| Serpinb6b | -4.25 | Mgat3      | 4.78  |
| Serpine2  | 5.93  | Mgmt       | 8.39  |
| Serpinf1  | 6.74  | Mgst3      | -2.22 |
| Serping1  | -5.04 | Mif4gd     | 3.77  |
| Sesn1     | -2.64 | Mkrn1      | 2.26  |
| Sfrp1     | -5.89 | Mkx        | -3.52 |
| Sft2d2    | -2.48 | Mllt3      | -2.75 |
| Sgcd      | 2.46  | Mmp16      | -2.65 |
| Sgk1      | 4.04  | Mmp17      | 3.82  |
| Sgk3      | -3.07 | Mmp2       | -6.48 |
| Sh3d21    | -3.09 | Mmp3       | -4.70 |
| Sh3tc1    | -3.03 | Mnd1       | -2.34 |
| Sh3tc2    | -2.47 | Morn4      | -2.41 |
| Sh3yl1    | -2.03 | Mpp2       | 2.47  |
| Shox2     | 4.21  | Mrap       | 2.81  |
| Shroom2   | -4.28 | Mrgprf     | -3.16 |
| Shroom3   | -4.05 | Mrps6      | -2.22 |
| Six1      | 4.05  | Mrvi1      | 2.75  |
| Slamf9    | -2.36 | Msln       | -2.85 |
| Slc12a6   | -2.39 | Mt1        | 2.12  |
| Slc12a8   | -2.52 | Mt2        | 3.55  |
| Slc16a9   | -2.78 | Mtus1      | 3.02  |
| Slc23a2   | 2.35  | Muc16      | 9.02  |
| Slc23a3   | -6.08 | Murc       | -3.27 |
| Slc25a23  | -2.76 | Myh10      | 2.29  |
| Slc29a1   | 4.21  | Myl7       | 2.02  |
| Slc2a8    | -1.92 | Mylk3      | 4.87  |
| Slc31a2   | -2.29 | Myo1b      | -2.08 |
| Slc39a14  | 2.45  | Myo1e      | -2.37 |
| Slc46a3   | 2.45  | Myo5b      | 6.94  |
| Slc48a1   | -1.95 | Myo6       | 2.07  |
| Slc4a3    | -2.38 | Myoz2      | 2.13  |
| Slc7a4    | -3.63 | Myzap      | 3.72  |
| Slc9a3r1  | -5.18 | N4bp2l1    | 2.78  |
| Smim1     | -7.58 | Nabp1      | -2.03 |
| Smpd3     | -7.82 | Naprt1     | 3.76  |
| Smpdl3b   | -3.08 | Ncam1      | -4.76 |
| Snai1     | 4.17  | Ncrna00085 | 2.79  |
| Snrnp25   | 2.33  | Ndfip1     | 2.03  |
| Snx32     | -2.56 | Ndn        | 2.74  |
| Soat1     | -3.63 | Ndrp2      | 5.10  |
| Soat2     | 3.81  | Ndufa4     | 1.86  |
| Soga3     | -2.33 | Neurl1a    | 4.41  |

|          |       |         |       |
|----------|-------|---------|-------|
| Sort1    | -5.56 | Nfe2l3  | 4.21  |
| Sox4     | -2.18 | Ngef    | -2.53 |
| Sp3      | -2.76 | Ngf     | -4.24 |
| Spats2l  | -3.59 | Nid1    | -7.29 |
| Sphk1    | 3.69  | Nid2    | 2.99  |
| Spint1   | -2.24 | Ninl    | 1.92  |
| Sprr1a   | -3.74 | Nipal1  | -3.82 |
| Srgap3   | 2.93  | Nkain2  | -2.72 |
| Srpx2    | 8.08  | Nkain4  | 2.96  |
| St3gal4  | 2.13  | Nme7    | 6.05  |
| Stac2    | 4.54  | Nod1    | 5.90  |
| Stim1    | -2.77 | Notch1  | -3.29 |
| Stk39    | -2.35 | Notch4  | -3.43 |
| Strbp    | -3.47 | Nppb    | -6.25 |
| Sulf1    | -6.69 | Npr2    | -3.07 |
| Sulf2    | 2.58  | Nr5a1   | 1.91  |
| Sv2a     | -4.10 | Nrcam   | -6.57 |
| Swap70   | 3.41  | Nrg1    | 1.97  |
| Sybu     | 3.61  | Nrn1    | -2.03 |
| Sync     | -2.53 | Nuak2   | 3.96  |
| Syne3    | 2.71  | Nudt10  | 2.59  |
| Syngr1   | -3.75 | Numb    | 1.73  |
| Synj2    | 2.16  | Nup133  | -1.79 |
| Syt12    | 3.40  | Nxn12   | 6.22  |
| Tceal6   | -4.63 | Oaf     | -2.74 |
| Tcn2     | -2.80 | Obfc1   | -1.96 |
| Tec      | -4.30 | Olfml2b | 2.34  |
| Tfcp2l1  | -7.54 | Olfml3  | -1.85 |
| Tgfb1i1  | 3.31  | Oplah   | 4.91  |
| Thbs2    | 8.50  | Ormdl3  | 3.12  |
| Tiam1    | -4.15 | Osbp16  | -4.30 |
| Timp2    | -2.14 | Osr1    | -2.34 |
| Tjp2     | -2.70 | Otx1    | 3.42  |
| Tmc4     | -3.13 | P4ha2   | -1.72 |
| Tmc6     | -2.54 | Parm1   | 5.37  |
| Tmem100  | 2.61  | Pawr    | 4.89  |
| Tmem107  | 1.98  | Pcbp4   | -1.91 |
| Tmem108  | -8.48 | Pcdh7   | -2.26 |
| Tmem119  | 3.42  | Pcdh9   | -4.56 |
| Tmem141  | -2.62 | Pcdhb12 | 2.20  |
| Tmem176a | -5.56 | Pcolce2 | -4.65 |
| Tmem176b | -5.80 | Pcsk9   | -6.20 |
| Tmem178  | -3.30 | Pdcd4   | 2.83  |
| Tmem180  | -2.38 | Pde4dip | 3.20  |
| Tmem238  | 2.99  | Pdgfa   | -1.77 |
| Tmem255a | -7.78 | Pdgfc   | -3.08 |
| Tmem56   | -3.35 | Pdlim2  | -2.83 |
| Tmem8    | -2.04 | Pdzd2   | 3.29  |
| Tmem98   | -3.94 | Pdzrn3  | -6.49 |
| Tmtc2    | -3.86 | Peg3    | 2.18  |

|           |        |          |        |
|-----------|--------|----------|--------|
| Tnfrsf11b | 6.20   | Pfkip    | -4.12  |
| Tnfrsf22  | 3.12   | Pgf      | -3.85  |
| Tnip1     | -2.66  | Pgk1     | -2.24  |
| Tpbp      | 2.31   | Phgdh    | -2.82  |
| Tpd52     | -3.50  | Pigyl    | 2.32   |
| Tpd52l1   | -3.45  | Pip5k1b  | 3.66   |
| Tprn      | -2.92  | Pkhd1l1  | 7.43   |
| Trem2     | -3.30  | Plau     | -4.78  |
| Trf       | -9.01  | Plce1    | 2.40   |
| Trib3     | 4.24   | Plcl2    | -2.57  |
| Tril      | 4.04   | Pld3     | 2.49   |
| Trim47    | 2.64   | Plec     | -1.88  |
| Trp63     | 3.07   | Plekhb1  | 4.80   |
| Tspan32   | -5.21  | Plekhg5  | 5.37   |
| Tspan4    | 2.48   | Plk1s1   | 3.54   |
| Tspan7    | -5.26  | Plxdc1   | 4.87   |
| Tuft1     | -2.70  | Pnpo     | 2.31   |
| Tulp2     | -6.80  | Podxl    | 3.28   |
| Twist2    | 5.63   | Popdc3   | -2.82  |
| Ube2h     | -3.37  | Pou3f1   | 5.50   |
| Uchl1     | -4.18  | Ppap2c   | -3.00  |
| Ugp2      | -2.10  | Ppp1r13b | 2.20   |
| Ugt1a10   | -4.69  | Ppp1r26  | 2.13   |
| Ugt1a6b   | -4.26  | Ppp1r9a  | 4.92   |
| Ugt1a7c   | -2.90  | Pqlc1    | 3.12   |
| Unc119    | -3.42  | Prelp    | -2.34  |
| Unc119b   | -2.33  | Prickle1 | 5.18   |
| Unc13b    | -8.23  | Prkcd    | 2.30   |
| Upk1b     | -11.06 | Prkcdbp  | -2.40  |
| Upk3b     | -10.43 | Prl2c2   | -10.89 |
| Usp2      | -5.42  | Prl2c3   | -10.55 |
| Usp54     | -2.72  | Prl2c4   | -10.68 |
| Vat1l     | -2.71  | Prodh    | -2.51  |
| Vmac      | -2.10  | Prokr2   | 2.67   |
| Vopp1     | -2.56  | Prr15l   | 5.02   |
| Vsig2     | -2.54  | Prr7     | -3.48  |
| Vsig8     | -7.59  | Prss12   | 2.95   |
| Wbscr27   | -2.55  | Psca     | -2.62  |
| Wdr92     | -10.21 | Psen2    | 2.93   |
| Wisp2     | 8.93   | Psrc1    | 2.64   |
| Wnt5b     | -2.89  | Ptgis    | 9.04   |
| Xlr4a     | -5.10  | Ptk2b    | 2.27   |
| Zbtb7c    | -3.08  | Ptk7     | 4.76   |
| Zbtb8b    | -6.26  | Ptpla    | -2.72  |
| Zfp219    | -1.96  | Ptplad1  | 1.93   |
| Zfp239    | 3.00   | Ptplad2  | 2.55   |
| Zfp385a   | -2.31  | Ptpn22   | -3.90  |
| Zfp385b   | -4.15  | Ptprd    | 7.32   |
| Zfp579    | -2.78  | Ptpre    | -4.88  |
| Zfp608    | 2.22   | Ptprf    | 4.79   |

|        |       |          |       |
|--------|-------|----------|-------|
| Zfp612 | -4.31 | Ptprn    | -3.96 |
| Zfp704 | -3.70 | Ptprv    | 5.74  |
| Zic4   | 3.96  | Ptrh1    | -2.89 |
| Zmat1  | -2.34 | Pvrl2    | 3.04  |
|        |       | Pvrl3    | -2.86 |
|        |       | Pxdc1    | -3.57 |
|        |       | Rabl2    | -3.22 |
|        |       | Raet1b   | -3.77 |
|        |       | Raet1c   | -4.46 |
|        |       | Ralgps1  | 2.49  |
|        |       | Rap1gap  | 4.35  |
|        |       | Rap1gap2 | -3.87 |
|        |       | Rarres2  | 6.90  |
|        |       | Rasa3    | -2.37 |
|        |       | Rasa4    | -2.85 |
|        |       | Rasgrp3  | 2.58  |
|        |       | Rasl11a  | 4.43  |
|        |       | Rasl11b  | 4.37  |
|        |       | Rbm28    | 2.32  |
|        |       | Rbm47    | 3.25  |
|        |       | Rbp1     | 8.10  |
|        |       | Rbpms    | 3.35  |
|        |       | Rcan2    | 4.76  |
|        |       | Rcn3     | 4.09  |
|        |       | Rcsd1    | 3.49  |
|        |       | Rell2    | 2.72  |
|        |       | Rep15    | 3.47  |
|        |       | Rfc5     | -1.83 |
|        |       | Rgs16    | -6.77 |
|        |       | Rgs17    | -4.19 |
|        |       | Rgs3     | 3.45  |
|        |       | Rhbd1    | 4.46  |
|        |       | Rhebl1   | -2.18 |
|        |       | Rhobtb1  | 3.24  |
|        |       | Rhoj     | -3.52 |
|        |       | Rhou     | 2.63  |
|        |       | Rhox5    | -2.89 |
|        |       | Ripk3    | 2.09  |
|        |       | Rnase4   | 2.95  |
|        |       | Rnf130   | 3.70  |
|        |       | Rora     | 2.95  |
|        |       | Rpp25    | 6.83  |
|        |       | Rps4y2   | 4.80  |
|        |       | Rsad1    | 1.77  |
|        |       | Rsph1    | 2.50  |
|        |       | Rsph9    | 2.42  |
|        |       | Rtn1     | 7.13  |
|        |       | S100a1   | 5.01  |
|        |       | S100a7a  | -6.29 |
|        |       | Saa3     | 6.49  |

|           |       |
|-----------|-------|
| Sag       | -2.92 |
| Sat2      | 2.37  |
| Satb1     | 4.85  |
| Sbk1      | 3.41  |
| Scara3    | -5.00 |
| Scg5      | 2.11  |
| Scly      | -2.97 |
| Scrn1     | -2.55 |
| Scube3    | 2.35  |
| Sdr39u1   | 2.61  |
| Sdr42e1   | 2.03  |
| Sdsl      | 5.02  |
| Sepp1     | 4.76  |
| 11-Sep    | -2.39 |
| 5-Sep     | -2.69 |
| Serf1     | 1.92  |
| Serpinb1a | 4.40  |
| Serpinb6b | 2.98  |
| Serpinf1  | -4.47 |
| Serping1  | 4.19  |
| Sesn1     | 3.78  |
| Sfrp1     | 4.55  |
| Sgcd      | -2.66 |
| Sgk1      | -3.63 |
| Sgk3      | 2.36  |
| Sgms2     | -3.00 |
| Sgsm1     | -2.69 |
| Sh3d21    | 4.50  |
| Sh3kbp1   | -4.55 |
| Sh3tc1    | 3.20  |
| Sh3tc2    | 2.47  |
| Shcbp1    | -2.10 |
| Shroom2   | 4.16  |
| Shroom3   | 4.22  |
| Six1      | -2.94 |
| Slc12a8   | 2.44  |
| Slc23a3   | 5.80  |
| Slc24a3   | 2.90  |
| Slc25a23  | 3.35  |
| Slc25a37  | -2.72 |
| Slc25a45  | 2.80  |
| Slc29a1   | -3.15 |
| Slc30a1   | 3.06  |
| Slc31a2   | 2.29  |
| Slc40a1   | 3.74  |
| Slc44a3   | 2.93  |
| Slc45a3   | 3.06  |
| Slc46a1   | 3.22  |
| Slc48a1   | 1.88  |
| Slc4a4    | 3.09  |



|          |       |
|----------|-------|
| Slc4a8   | -3.32 |
| Slc7a4   | 2.95  |
| Slc7a8   | 2.57  |
| Slc9a3r1 | 3.77  |
| Slc9a3r2 | 2.27  |
| Slit3    | 3.97  |
| Smad6    | 3.02  |
| Smim1    | 7.87  |
| Smpd2    | 1.83  |
| Smpd3    | 8.35  |
| Smpdl3b  | 5.40  |
| Snai1    | -2.56 |
| Snca     | -3.78 |
| Soat1    | 2.87  |
| Soga2    | -2.29 |
| Soga3    | 5.56  |
| Sorbs3   | 2.34  |
| Sort1    | 3.46  |
| Sox4     | 2.48  |
| Sox5     | 3.16  |
| Sp3      | 2.66  |
| Spata2l  | 1.73  |
| Spats2l  | 4.26  |
| Specc1   | -2.32 |
| Spink2   | -4.64 |
| Spsb1    | 2.54  |
| Spsb4    | -3.62 |
| Srgap3   | -3.18 |
| Srpx     | 3.35  |
| Ssh3     | 2.88  |
| Stab1    | -1.84 |
| Stac2    | -4.32 |
| Stambpl1 | -4.43 |
| Stard5   | 3.69  |
| Stc1     | -2.64 |
| Stim1    | 2.36  |
| Stk39    | 2.52  |
| Strbp    | 2.70  |
| Sulf1    | 6.10  |
| Suv39h1  | -2.17 |
| Sv2a     | 3.96  |
| Swap70   | -3.13 |
| Syn1     | -3.75 |
| Syne3    | -2.29 |
| Synj2    | -2.60 |
| Syt12    | -3.28 |
| Tacc1    | 2.21  |
| Tbc1d9   | -1.99 |
| Tceal6   | 4.62  |
| Tead4    | -3.78 |

|           |       |
|-----------|-------|
| Tenm3     | -3.90 |
| Tfcp2l1   | 6.60  |
| Tgfb1i1   | -3.60 |
| Tgfb3     | 2.97  |
| Tgfbr1    | 1.96  |
| Thbd      | 5.09  |
| Thbs2     | -5.03 |
| Tiam2     | -3.49 |
| Timp2     | 1.73  |
| Tln2      | -2.31 |
| Tm7sf3    | 3.40  |
| Tmc4      | 3.52  |
| Tmem108   | 8.59  |
| Tmem132a  | 2.03  |
| Tmem154   | 2.24  |
| Tmem176a  | 2.87  |
| Tmem176b  | 3.38  |
| Tmem178   | 3.42  |
| Tmem2     | 2.77  |
| Tmem200a  | -4.03 |
| Tmem238   | -2.33 |
| Tmem255a  | 7.55  |
| Tmem40    | -2.38 |
| Tmem56    | 3.27  |
| Tmem64    | 2.61  |
| Tmem8     | 2.85  |
| Tmem98    | 4.26  |
| Tmtc2     | 4.11  |
| Tnc       | -4.68 |
| Tnfrsf1b  | 1.69  |
| Tnfrsf22  | -4.83 |
| Tnfrsf25  | 3.68  |
| Tnfrsf26  | -5.81 |
| Tnnc1     | -1.75 |
| Tpbp      | -2.71 |
| Tpd52l1   | 3.39  |
| Tpk1      | 1.92  |
| Tprn      | 2.36  |
| Trf       | 7.06  |
| Trim16    | -2.84 |
| Trim30a   | -3.35 |
| Trp53inp1 | 3.98  |
| Tsc22d1   | 2.39  |
| Tspan12   | -3.92 |
| Tspan32   | 4.50  |
| Tspan4    | -2.43 |
| Tspan7    | 4.12  |
| Ttc30b    | 2.35  |
| Ttc39b    | -2.08 |
| Tuba1a    | -2.96 |

|         |       |
|---------|-------|
| Tubb6   | -2.63 |
| Tulp2   | 6.62  |
| Twist1  | -2.16 |
| Twist2  | -6.78 |
| Uba1    | -1.84 |
| Ube2h   | 2.98  |
| Uchl1   | 3.39  |
| Ugp2    | 2.14  |
| Ugt1a6a | 2.56  |
| Ugt1a7c | 2.55  |
| Unc119  | 3.24  |
| Unc119b | 1.80  |
| Unc13b  | 7.64  |
| Unc5b   | 2.82  |
| Upk1b   | 10.16 |
| Upk3b   | 9.54  |
| Upp1    | -6.47 |
| Urah    | -4.04 |
| Usp2    | 2.96  |
| Usp53   | 2.90  |
| Usp54   | 2.34  |
| Vcam1   | -2.22 |
| Vsig8   | 6.85  |
| Wdr92   | 9.32  |
| Wipf1   | -4.46 |
| Wnt4    | 4.57  |
| Wnt5b   | 3.35  |
| Xlr4a   | 4.84  |
| Xrcc3   | 2.65  |
| Xyylt1  | -2.03 |
| Zbtb7c  | 4.59  |
| Zbtb8b  | 7.02  |
| Zcchc3  | 2.34  |
| Zfp185  | 3.21  |
| Zfp2    | 2.16  |
| Zfp385a | 2.53  |
| Zfp579  | 3.29  |
| Zfp608  | -2.49 |
| Zfp612  | 3.94  |
| Zmat1   | 2.01  |
| Zzz3    | 1.81  |
