# Supplementary material
Source: PubMed Central journal article supplement (PMC5023457)
Supplement: NIHMS756739-supplement-2.pdf [file NIHMS756739-supplement-2.pdf]

**Supplementary Table 2.** Differentially (DE) genes from three or four group comparisons shown in Fig. 6B (q<0.001)

|                                                                                                                |                                                                                                                                                                                                                                                                                                                                                                                                                                                                                                                                                                                                                      |
|----------------------------------------------------------------------------------------------------------------|----------------------------------------------------------------------------------------------------------------------------------------------------------------------------------------------------------------------------------------------------------------------------------------------------------------------------------------------------------------------------------------------------------------------------------------------------------------------------------------------------------------------------------------------------------------------------------------------------------------------|
| <b>DE genes (n=6) common to all four groups</b>                                                                | Col4a1, Emb, Gas6, Gata6, Igfbp3, Krt19                                                                                                                                                                                                                                                                                                                                                                                                                                                                                                                                                                              |
| <b>DE genes (n=10) common MKPOSE-EV vs MKPOSE-AdCre", "T vs Liver" and "T vs Lung"</b>                         | Atp1b1, Bmp4, Eps8l2, Fgfr2, Gpr149, Kprp, Lpar4, Msln, Pcsk9, Snca                                                                                                                                                                                                                                                                                                                                                                                                                                                                                                                                                  |
| <b>DE genes (n=7) common to "MKP- Liver vs MKP -Lung", "MKP-T vs MKP-Liver" and "MKP-T vs MKP-Lung"</b>        | Cpne8, Gpr176, Lox, Pcdh7, Ptgis, Ptprd, Thbs2                                                                                                                                                                                                                                                                                                                                                                                                                                                                                                                                                                       |
| <b>DE genes (n=16) common to "MKP-Liver vs MKP-Lung", "MKPOSE-EV vs MKPOSE-AdCre" and "MKP-T vs MKP-Lung"</b>  | Adap1, Akap12, Col15a1, Epb4.113, Fam132b, Fbln1, Itga11, Itga3, Megf10, Nrep, Ptn, Ror2, Serpine2, Srp2, Sybu, Vat11                                                                                                                                                                                                                                                                                                                                                                                                                                                                                                |
| <b>DE genes (n=82) common to "MKP-Liver vs MKP-Lung", "MKPOSE-EV vs MKPOSE-AdCre" and "MKP-T vs MKP-Liver"</b> | A730049H05Rik, Acot11, Adamts12, Adh7, Aldh1a1, Ank, Ank3, Ankrd1, Aqp1, Asns, Axin2, Bicc1, Bnc1, C2, Car11, Ccdc92, Cd200, Cd44, Cdkn2a, Clmp, Cntnap4, Col4a2, Col8a1, Cpz, Crabp1, Cyp2s1, Ddc, Ddr1, Epb4.115, F11r, Fgf7, Fmnl2, Fscn1, Gdnf, Glipr1, Glipr2, Gng2, Gpc1, Grem1, Gria3, Gstt3, Hs3st1, Igfbp5, Itfg3, Itga7, Itm2a, Kcp, Klhl30, Limch1, Lrp2, Lrp8, Lrn4, Lurap11, Lypd1, Mef2c, Murc, Myl7, Nme7, Osr1, Pdgfc, Peg3, Rarres2, Rasl11a, Rgs17, Serpinf1, Serping1, Sh3tc1, Sh3tc2, Six1, Slc9a3r1, Smim1, Smpd3, Sort1, Sox4, Stim1, Tceal6, Tmem176a, Tmem255a, Twist2, Usp2, Zbtb7c, Zbtb8b |
