# Supplementary material
Source: PubMed Central journal article supplement (PMC5023457)
Supplement: NIHMS756739-supplement-3.pdf [file NIHMS756739-supplement-3.pdf]

**Supplementary Table 3.** Molecular and cellular functions as revealed by Ingenuity Pathway Analysis of 121 genes associated with EMT

| <b>Molecular and Cellular Functions</b> |                     |                   |
|-----------------------------------------|---------------------|-------------------|
| <b>Name</b>                             | <b>p-value</b>      | <b>#Molecules</b> |
| Cellular Movement                       | 1.96E-03 - 3.05E-12 | 49                |
| Cellular Development                    | 1.93E-03 - 2.46E-08 | 57                |
| Cellular Growth and Proliferation       | 1.93E-03 - 4.42E-08 | 62                |
| Cell Morphology                         | 2.02E-03 - 1.22E-07 | 48                |
| Cell Death and Survival                 | 1.96E-03 - 1.74E-07 | 50                |
