# Supplementary material
Source: PubMed Central journal article supplement (PMC5023457)
Supplement: NIHMS756739-supplement-4.pdf [file NIHMS756739-supplement-4.pdf]

**Supplementary Table 4.** Differentially expressed murine genes upregulated in TCGA ovarian cancer patients with decreased survival

| <b>Genes upregulated in patients with decreased survival* and in murine cell lines with EMT<sup>#</sup></b>                                              | <b>Genes upregulated in patients with decreased survival and downregulated in murine cell lines with EMT</b> |
|----------------------------------------------------------------------------------------------------------------------------------------------------------|--------------------------------------------------------------------------------------------------------------|
| AQP1, ASAM, CD44, COL15A1,EPB41L3, FBLN1, FGF7, GNG2, GPR23, GREM1, GRIA3, ITGA11, LOX, MEF2C, MEGF10, PTGIS, PTPRD, RGS17, ROR2, SERPINF1, SRPX2, THBS2 | ADAMTS12, COL4A1, COL4A2, COL8A1, CPNE8, HS3ST1, ITM2A, TMEM176A                                             |

\*Human genes were selected based on upregulation profile seen in Fig 6D, cluster 1 (accolades).

<sup>#</sup>Changes in the corresponding DE murine genes (magnitude and directionality) are provided in Supplementary Table 1.
